# Supplementary material for: Epoxide activation by a silver phosphonate for heterogeneous catalysis of CO2 cycloaddition
Source: Royal Society of Chemistry journal article supplement (doi:10.1039/d2ce01240e), 2022-11-10
Supplement: d2ce01240e2.pdf [file d2ce01240e2.pdf]

## Supporting Information

### Epoxide activation by a silver phosphonate for heterogeneous catalysis of CO<sub>2</sub> cycloaddition

Chao-Ying Gao,<sup>†\*ab</sup> Chen Mao,<sup>†ab</sup> Yang Yang,<sup>a</sup> Ning Xu,<sup>a</sup> Jinglin Liu,<sup>a</sup> Xiaohong Chen,<sup>a</sup> Jinghai Liu,<sup>\*ab</sup>  
and Limei Duan<sup>\*ab</sup>

*a. College of Chemistry and Materials Science, Inner Mongolia Minzu University (IMMN),  
Tongliao 028043, Inner Mongolia, People's Republic of China. Email: chaoyinggao@163.com;  
jhliu2008@sinano.ac.cn.; duanlmxie@126.com;*

*b. Inner Mongolia Key Lab of Carbon Nanomaterials, Nano Innovation Institute (NII), Inner  
Mongolia Minzu University (IMMN), Tongliao 028000, People's Republic of China*

<sup>†</sup> *These authors contributed equally.*

### Supplementary Index

#### Contents

- S1. Materials and Methods
- S2. Supplementary tables and figures
- S3. The NMR spectrums
- S4. References

## S1. Materials and Methods

### 1.1 General information

#### Materials and Instrument

All commercial chemicals were used without further purification except for organo-phosphonate ligand H<sub>3</sub>L, which was synthesized by a modified procedure documented previously.<sup>1</sup>

Powder X-ray diffraction (PXRD) was carried out with a MiniFlex 600 X-ray powder diffractometer equipped with a Cu sealed tube ( $\lambda = 1.54178 \text{ \AA}$ ) at 40 kV and 40 mA. Elemental analyses for C, H, and N were performed by a VarioEL analyzer. Thermal gravimetric analysis (TGA) was conducted under an air atmosphere with a heating rate of 10 °C/min on a SDT 2960 Simultaneous DSC-TGA of TA instruments up to 800 °C. The infrared (IR) spectra (diamond) were recorded on a Nicolet 7600 FT-IR spectrometer within the 4000-500 cm<sup>-1</sup> region. <sup>1</sup>H NMR spectra were carried out in CDCl<sub>3</sub> solvent on a Bruker 400 MHz spectrometer. The chemical shift is given in dimensionless  $\delta$  values and is referenced relative to TMS in <sup>1</sup>H spectroscopy. Yields were determined by GC analysis using methanol as the solvent. (Shimadzu GC-2014 equipped with a capillary column (HP-5, 30 m  $\times$  0.25  $\mu$ m  $\times$  0.32 mm) using a flame ionization detector. Heating method: 50 °C for 2 min and then warming up to 300 °C (heating rate: 15 °C/min). Scanning electron microscopy (SEM, Hitachi S-4800) coupled with an energy dispersive X-ray spectroscopy (EDS) was used to determine the morphologies and element analysis of the samples.

### 1.2 Single-Crystal X-ray Crystallography

Single-crystal X-ray diffraction (SXRD) data of compound [Ag<sub>10</sub>(H<sub>3</sub>L)<sub>2</sub>(H<sub>2</sub>O)<sub>2</sub>(4,4'-bipy)] were collected on a Bruker diffractometer using Mo *K* $\alpha$  radiation ( $\lambda = 1.54178 \text{ \AA}$ ) at 293 K. Data processing was accomplished with the SAINT processing program.<sup>2</sup> The structure was solved by the direct methods and refined by full-matrix least-squares fitting on  $F^2$  using the SHELXTL crystallographic software package.<sup>3</sup> Non-hydrogen atoms were refined with anisotropic displacement parameters during the final cycles. All hydrogen atoms of the organic molecule were placed by geometrical considerations and were added to the structure factor calculation. The final formula of [Ag<sub>10</sub>(H<sub>3</sub>L)<sub>2</sub>(H<sub>2</sub>O)<sub>2</sub>(4,4'-bipy)] was determined mainly determined by single-crystal X-ray diffraction, combining charge equilibrium consideration, thermogravimetric analysis (TGA) and elemental analysis.

Elemental analysis: Calculated for Ag<sub>10</sub>P<sub>8</sub>C<sub>62</sub>N<sub>2</sub>O<sub>26</sub>H<sub>50</sub> (MW 2565.53): C, 29.03; N, 1.09; H, 1.96. Found: C, 29.15; N, 1.06; H, 1.98.

Crystallographic data for Ag<sub>10</sub>P<sub>8</sub>C<sub>62</sub>N<sub>2</sub>O<sub>26</sub>H<sub>50</sub> (CCDC: 2203855) has been deposited with Cambridge Crystallographic Data Centre. Data can be obtained free of charge upon request at [www.ccdc.cam.ac.uk/data\\_request/cif](http://www.ccdc.cam.ac.uk/data_request/cif). Crystal data and structure refinement is summarized in Table S1.

### 1.3 Cycloaddition of CO<sub>2</sub> to epoxides

Yields except for the final ones were calculated by GC using n-dodecane as internal standard substance, and the final products and corresponding conversions were determined and by <sup>1</sup>H NMR spectroscopy.

The conversion was calculated from <sup>1</sup>H NMR according to the following equation.

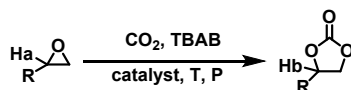

$$\text{conversion} = \frac{{}^1\text{Hb}}{({}^1\text{Ha} + {}^1\text{Hb})}$$

## S2 Supplementary tables and figures

**Table S 1** Crystallographic data

|                                                                             |                                                                                                |
|-----------------------------------------------------------------------------|------------------------------------------------------------------------------------------------|
| Formula                                                                     | Ag <sub>10</sub> P <sub>8</sub> C <sub>62</sub> N <sub>2</sub> O <sub>26</sub> H <sub>50</sub> |
| <i>F<sub>w</sub></i>                                                        | 2565.53                                                                                        |
| Temperature, K                                                              | 293(2)                                                                                         |
| Crystal system                                                              | Triclinic                                                                                      |
| Radiation source                                                            | Mo <i>K</i> α                                                                                  |
| Space group                                                                 | <i>P</i> -1                                                                                    |
| <i>a</i> , Å                                                                | 10.7786(6)                                                                                     |
| <i>b</i> , Å                                                                | 12.6891(7)                                                                                     |
| <i>c</i> , Å                                                                | 14.2722(8)                                                                                     |
| α, deg                                                                      | 77.4970(10)                                                                                    |
| β, deg                                                                      | 86.2210(10)                                                                                    |
| γ, deg                                                                      | 67.3010(10)                                                                                    |
| <i>V</i> , Å <sup>3</sup>                                                   | 7875.5(10)                                                                                     |
| <i>Z</i>                                                                    | 2                                                                                              |
| <i>D<sub>c</sub></i> , mg/mm <sup>3</sup>                                   | 2.420                                                                                          |
| μ, mm <sup>-1</sup>                                                         | 2.987                                                                                          |
| <i>F</i> (000)                                                              | 1230                                                                                           |
| reflection collected                                                        | 10528                                                                                          |
| Total/unique reflections                                                    | 10528 / 6915                                                                                   |
| <i>R<sub>int</sub></i>                                                      | 0.0637                                                                                         |
| GOF on <i>F</i> <sup>2</sup>                                                | 0.983                                                                                          |
| <i>R</i> <sub>1</sub> / <i>wR</i> <sub>2</sub> ( <i>I</i> > 2σ( <i>I</i> )) | 0.0307/ 0.0986                                                                                 |
| <i>R</i> <sub>1</sub> / <i>wR</i> <sub>2</sub> (all data)                   | 0.0366 / 0.1286                                                                                |
| Largest diff. peak/hole / (e Å <sup>-3</sup> )                              | 1.148 and /-1.485                                                                              |

$$R_1 = \sum ||F_o| - |F_c|| / \sum |F_o| \cdot wR_2 = [\sum [w (F_o^2 - F_c^2)^2] / \sum [w (F_o^2)^2]]^{1/2}$$

**Table S2.** Selected bond lengths [Å] and angles [°] for **1**

|                       |            |                      |            |
|-----------------------|------------|----------------------|------------|
| Ag(1)-O(12)#1         | 2.250(4)   | Ag(3)-N(1)           | 2.221(5)   |
| Ag(1)-O(2)#2          | 2.283(4)   | Ag(3)-O(2)#4         | 2.333(4)   |
| Ag(1)-O(8)            | 2.485(4)   | Ag(3)-O(8)#5         | 2.438(4)   |
| Ag(1)-O(8)#3          | 2.553(4)   | Ag(3)-O(12)          | 2.549(4)   |
| Ag(1)-Ag(1)#3         | 2.9584(9)  | Ag(4)-O(14)          | 2.326(5)   |
| Ag(2)-O(11)           | 2.227(4)   | Ag(4)-O(5)#6         | 2.360(4)   |
| Ag(2)-O(9)#1          | 2.244(4)   | Ag(4)-O(7)#5         | 2.361(4)   |
| Ag(2)-O(6)#2          | 2.597(5)   | Ag(4)-O(12)          | 2.432(4)   |
| Ag(5)-O(7)#5          | 2.234(4)   | Ag(5)-O(3)#8         | 2.341(4)   |
| Ag(5)-O(9)#7          | 2.244(4)   | Ag(5)-O(6)#6         | 2.559(4)   |
| O(3)-Ag(5)#8          | 2.341(4)   | O(5)-Ag(4)#6         | 2.360(4)   |
| O(6)-Ag(5)#6          | 2.559(4)   | O(6)-Ag(2)#2         | 2.597(5)   |
| O(7)-Ag(5)#10         | 2.234(4)   | O(7)-Ag(4)#10        | 2.361(4)   |
| O(8)-Ag(3)#10         | 2.438(4)   | O(8)-Ag(1)#3         | 2.553(4)   |
| O(9)-Ag(5)#7          | 2.244(4)   | O(9)-Ag(2)#1         | 2.244(4)   |
| O(12)-Ag(1)#1         | 2.250(4)   |                      |            |
| O(12)#1-Ag(1)-O(2)#2  | 164.74(15) | O(12)#1-Ag(1)-O(8)   | 114.84(14) |
| O(2)#2-Ag(1)-O(8)     | 78.94(14)  | O(12)#1-Ag(1)-O(8)#3 | 84.62(14)  |
| O(2)#2-Ag(1)-O(8)#3   | 97.60(14)  | O(8)-Ag(1)-O(8)#3    | 108.10(10) |
| O(12)#1-Ag(1)-Ag(1)#3 | 105.78(11) | O(2)#2-Ag(1)-Ag(1)#3 | 87.31(11)  |
| O(8)-Ag(1)-Ag(1)#3    | 55.11(9)   | O(8)#3-Ag(1)-Ag(1)#3 | 52.99(9)   |
| O(11)-Ag(2)-O(9)#1    | 132.73(15) | O(11)-Ag(2)-O(6)#2   | 136.97(14) |
| O(9)#1-Ag(2)-O(6)#2   | 83.51(14)  | N(1)-Ag(3)-O(2)#4    | 143.13(17) |
| N(1)-Ag(3)-O(8)#5     | 119.29(16) | O(2)#4-Ag(3)-O(8)#5  | 78.99(14)  |
| N(1)-Ag(3)-O(12)      | 122.02(16) | O(2)#4-Ag(3)-O(12)   | 90.79(13)  |
| O(8)#5-Ag(3)-O(12)    | 81.04(13)  | O(14)-Ag(4)-O(5)#6   | 98.99(16)  |
| O(14)-Ag(4)-O(7)#5    | 117.19(16) | O(5)#6-Ag(4)-O(7)#5  | 116.56(14) |
| O(14)-Ag(4)-O(12)     | 121.36(16) | O(5)#6-Ag(4)-O(12)   | 117.42(14) |
| O(7)#5-Ag(4)-O(12)    | 86.80(13)  | O(14)-Ag(4)-Ag(5)    | 83.67(13)  |
| O(5)#6-Ag(4)-Ag(5)    | 91.49(10)  | O(7)#5-Ag(4)-Ag(5)   | 48.10(10)  |
| O(12)-Ag(4)-Ag(5)     | 134.66(9)  | O(7)#5-Ag(5)-O(9)#7  | 142.65(15) |
| O(7)#5-Ag(5)-O(3)#8   | 114.35(15) | O(9)#7-Ag(5)-O(3)#8  | 102.07(15) |

|                      |            |                      |            |
|----------------------|------------|----------------------|------------|
| O(7)#5-Ag(5)-O(6)#6  | 104.11(15) | O(9)#7-Ag(5)-O(6)#6  | 84.41(15)  |
| O(3)#8-Ag(5)-O(6)#6  | 88.03(14)  | O(7)#5-Ag(5)-Ag(4)   | 51.86(10)  |
| O(9)#7-Ag(5)-Ag(4)   | 96.00(11)  | O(3)#8-Ag(5)-Ag(4)   | 156.64(12) |
| O(6)#6-Ag(5)-Ag(4)   | 79.07(10)  | O(7)#5-Ag(5)-Ag(5)#9 | 85.02(11)  |
| O(9)#7-Ag(5)-Ag(5)#9 | 74.47(10)  | O(3)#8-Ag(5)-Ag(5)#9 | 110.38(11) |

Symmetry transformations used to generate equivalent atoms: #1:  $-x+1, -y, -z+1$ ; #2:  $-x+1, -y, -z$ ; #3:  $-x+1, -y-1, -z+1$ ; #4  $-x+1, -y+1, -z$ ; #5  $x, y+1, z$ ; #6  $-x+2, -y, -z$ ; #7:  $-x+2, -y, -z+1$ ; #8:  $-x+2, -y+1, -z$ ; #9:  $-x+2, -y+1, -z+1$ ; #10  $x, y-1, z$ .

**Table S3** Comparison with different MOF catalysts in the cycloaddition reaction of CO<sub>2</sub> and epichlorohydrin.

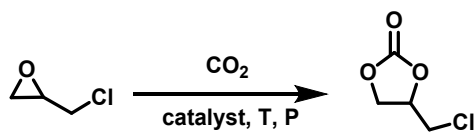

| Catalyst                | Co-cat.                       | Cat. / co-cat. (mmol) | T (K) | P (MPa) | T (h) | Yield (%) | TON  | TOF (h <sup>-1</sup> ) | Ref.      |
|-------------------------|-------------------------------|-----------------------|-------|---------|-------|-----------|------|------------------------|-----------|
| Gea-MOF-1               | <i>n</i> -Bu <sub>4</sub> NBr | 0.15 / 0.15           | 393   | 2.0     | 6     | 89        | 593  | 99                     | 4         |
| CHB (M)                 | <i>n</i> -Bu <sub>4</sub> NBr | 1.6 / 1.6             | 393   | 1.2     | 6     | 72        | 44.6 | 7                      | 5         |
| Ni(salphen)-MOF         | <i>n</i> -Bu <sub>4</sub> NBr | 2.8 / 3.0             | 353   | 2.0     | 4     | 84        | 300  | 75                     | 6         |
| ZnMOF-1-NH <sub>2</sub> | <i>n</i> -Bu <sub>4</sub> NBr | 1.0 / 2.5             | 353   | 0.8     | 8     | 89        | 84.8 | 10.6                   | 7         |
| NUC-30                  | <i>n</i> -Bu <sub>4</sub> NBr | 1.0 / 5.0             | 333   | 1.0     | 12    | 96        | 96   | 8                      | 8         |
| <b>1</b>                | <i>n</i> -Bu <sub>4</sub> NBr | 0.01 / 0.3            | 373   | 1.0     | 6     | 87        | 8700 | 1450.0                 | This work |

**Table S4.** Comparison with different MOF catalysts reported in the cycloaddition reaction of CO<sub>2</sub> and styrene oxide.

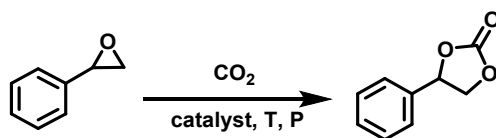

| Catalyst.                    | Co-Catalyst                   | Cat./Co-cat. (mmol) | T (K) | P (MPa) | T(h) | Yield (%) | TON   | TOF (h <sup>-1</sup> ) | Ref.      |
|------------------------------|-------------------------------|---------------------|-------|---------|------|-----------|-------|------------------------|-----------|
| NUC-30                       | <i>n</i> -Bu <sub>4</sub> NBr | 1.0 / 5.0           | 333   | 1.0     | 12   | 92        | 92    | 7.67                   | 8         |
| NH <sub>2</sub> -MIL-101(Al) | <i>n</i> -Bu <sub>4</sub> NBr | 0.17 / 0.14         | 393   | 1.8     | 6    | 96        | 564.7 | 94.1                   | 9         |
| Ni-TCPE-1                    | <i>n</i> -Bu <sub>4</sub> NBr | 0.5 / 1.5           | 373   | 1.0     | 12   | 99        | 2000  | 167                    | 10        |
| Ni-TCPE-2                    | <i>n</i> -Bu <sub>4</sub> NBr | 0.5 / 1.5           | 373   | 1.0     | 12   | 86.2      | 1720  | 143                    | 10        |
| Gea-MOF-1                    | <i>n</i> -Bu <sub>4</sub> NBr | 0.15/ 0.15          | 393   | 2.0     | 6    | 85        | 567   | 94.5                   | 4         |
| Ni(salphen)-MOF              | <i>n</i> -Bu <sub>4</sub> NBr | 2.8 / 3.0           | 353   | 2.0     | 4    | 81        | 289   | 72                     | 6         |
| CHB(M)                       | <i>n</i> -Bu <sub>4</sub> NBr | 1.6 / 1.6           | 393   | 1.2     | 6    | 56        | 35    | 6                      | 5         |
| <b>1</b>                     | <i>n</i> -Bu <sub>4</sub> NBr | 0.05 / 1.5          | 373   | 1.0     | 12   | 68.5      | 1370  | 114.2                  | This work |

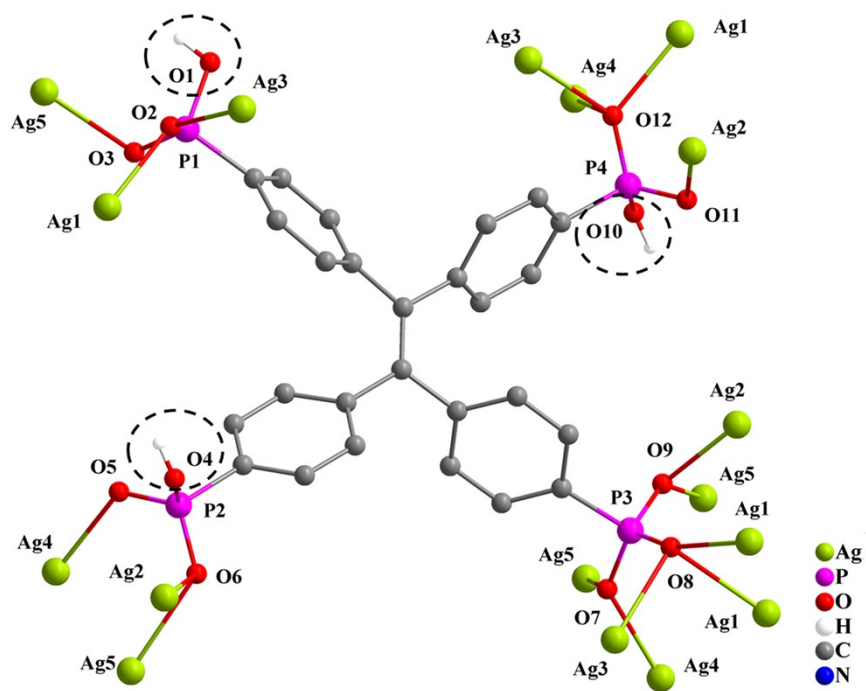

**Figure S1.** The representation of the deprotonated mode for  $H_3L^{5-}$ .

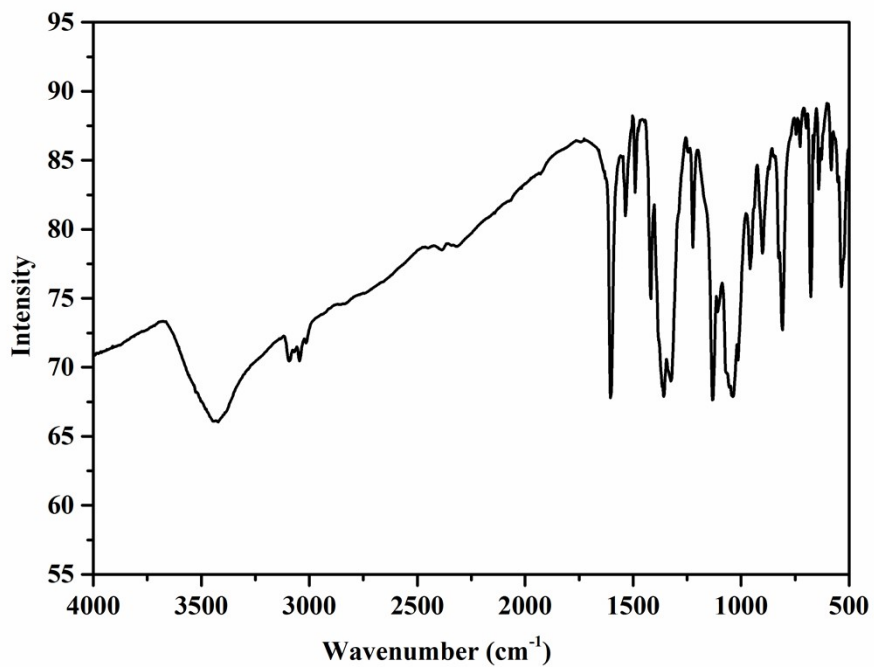

**Figure S2.** Infrared spectra of the compound **1**.

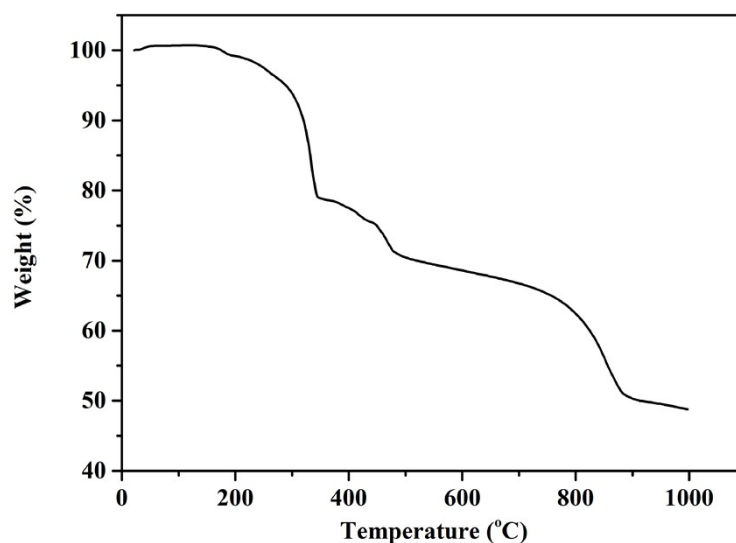

**Figure S3.** TG curve of compound **1**.

The thermal stabilities of the silver phosphate were studied using thermogravimetric analysis (TGA) under N<sub>2</sub> atmosphere. The TGA curve indicates that water molecules coordinated to Ag(I) centers were lost from room temperature (RT) to 230 °C with a weight loss of 1.61% (calcd: 1.40%). Then the TGA curve undergoes continuous weightlessness with decomposition of the phosphate and 4,4'-bipy ligands, in other words, compound **1** starts to fall into decomposition after about 230 °C.

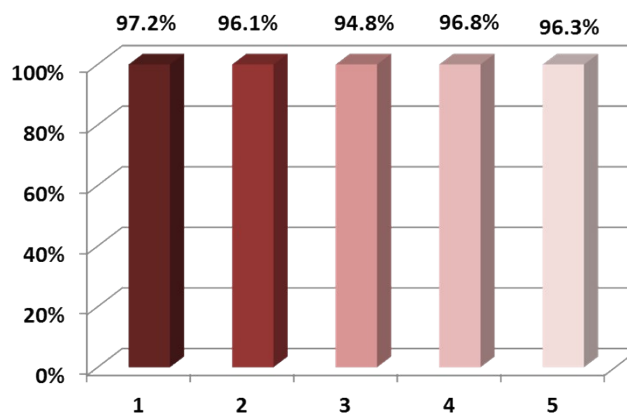



**Figure S4.** Histogram of recyclability study (five cycles) for catalytic activities of catalyst **1** in coupling of epichlorohydrin with CO<sub>2</sub>.

Reaction condition: 60 mmol of epichlorohydrin, 0.01 mmol of catalyst, P = MPa, T = 100 °C, t = 6 h.

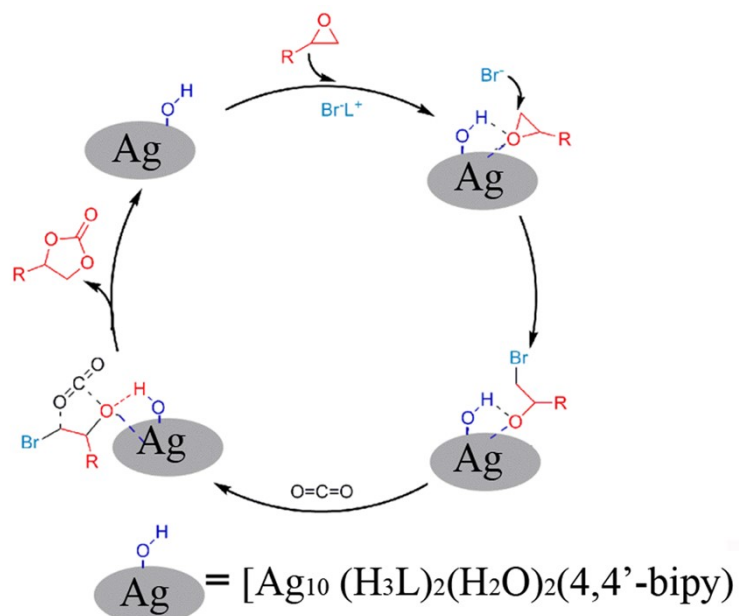

**Scheme S1** The proposed mechanism for the cycloaddition of CO<sub>2</sub> and epoxide at the solid/liquid interface assisted by bifunctional catalysis from Lewis acid and Brønsted acid ( $\text{L}^+$  = tetra-n-butylammonium).

### S3. The NMR spectrums

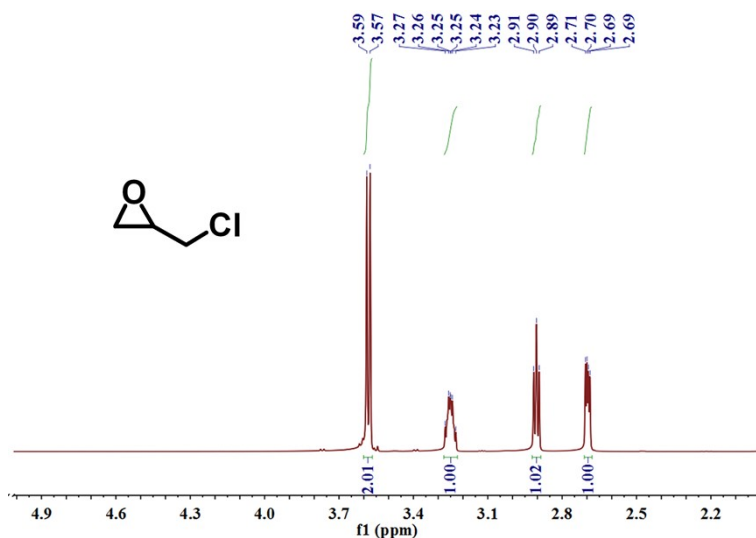

**Figure S5**  $^1\text{H}$  NMR spectra of epichlorohydrin (400 MHz,  $\text{CDCl}_3$ ):  $\delta = 3.57\text{-}3.59$  (d,  $J = 8.0$  Hz, 2H, Cl- $\text{CH}_2$ ), 3.23 – 3.27 (m, 1H, O-CH), 2.89-2.91 (t,  $J = 4.0$  Hz, 1H, O- $\text{CH}_2$ ), 2.69-2.71 (q,  $J = 4.0$  Hz, 1H, O- $\text{CH}_2$ ).

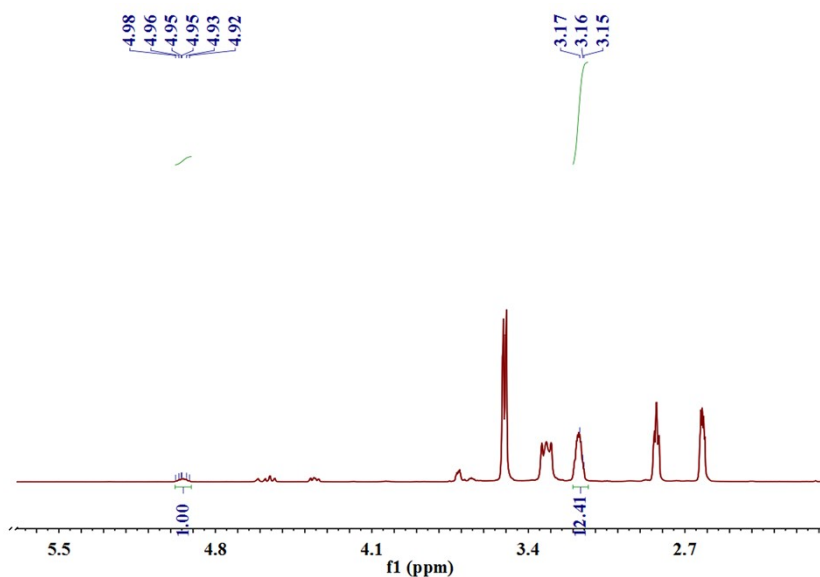

**Figure S6**  $^1\text{H}$  NMR spectra of the cycloaddition product of epichlorohydrin and  $\text{CO}_2$  (400 MHz,  $\text{CDCl}_3$ ):  $\delta = 4.92\text{-}4.98$  (m, 1H, COO-CH), 3.15-3.17 (m, 1H, O- $\text{CH}_2$ ).

Reaction conditions: epoxide (20 mmol), catalyst (0.01 mmol) and TBAB (0.3 mmol),  $T = 25$   $^\circ\text{C}$ ,  $P = 1$  Pa,  $t = 12$  h; Conversion = 7.5%.

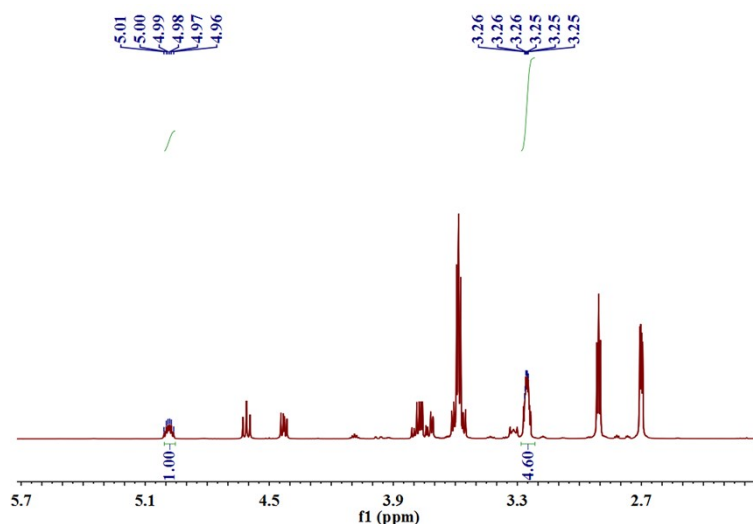

**Figure S7**  $^1\text{H}$  NMR spectra of the cycloaddition product of epichlorohydrin and  $\text{CO}_2$  (400 MHz,  $\text{CDCl}_3$ ) :  $\delta = 4.96\text{--}5.01$  (m, 1H, COO-CH), 3.25– 3.26 (m, 1H, O- $\text{CH}_2$ ).

Reaction conditions: epoxide (20 mmol), catalyst (0.01 mmol) and TBAB (0.3 mmol),  $T = 25\text{ }^\circ\text{C}$ ,  $P = 1\text{ MPa}$ ,  $t = 12\text{ h}$ ; Conversion = 17.8%.

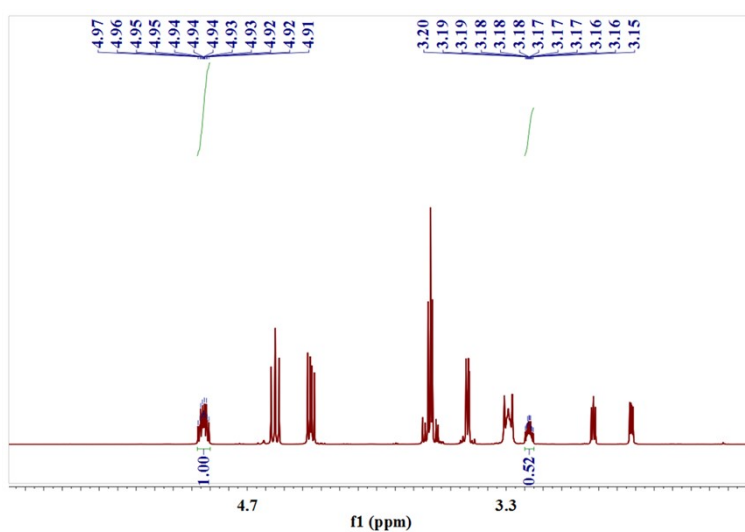

**Figure S8**  $^1\text{H}$  NMR spectra of the cycloaddition product of epichlorohydrin and  $\text{CO}_2$  (400 MHz,  $\text{CDCl}_3$ ) :  $\delta = 4.91\text{--}4.97$  (m, 1H, COO-CH), 3.15 – 3.20 (m, 1H, O- $\text{CH}_2$ ).

Reaction conditions: epoxide (20 mmol), catalyst (0.01 mmol) and TBAB (0.3 mmol),  $T = 60\text{ }^\circ\text{C}$ ,  $P = 1\text{ MPa}$ ,  $t = 12\text{ h}$ ; Conversion = 65.8%.

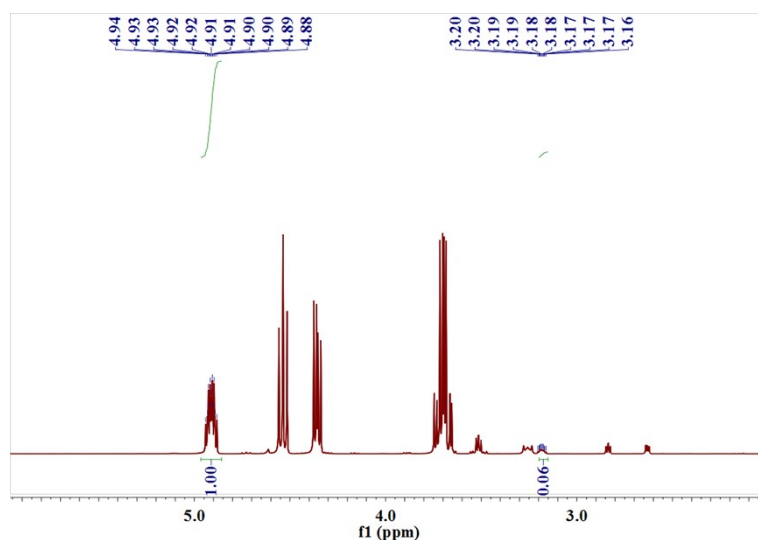

**Figure S9**  $^1\text{H}$  NMR spectra of the cycloaddition product of epichlorohydrin and  $\text{CO}_2$  (400 MHz,  $\text{CDCl}_3$ ) :  $\delta = 4.88$  -4.94 (m, 1H, COO-CH), 3.16 -3.20 (m, 1H, O- $\text{CH}_2$ ).

Reaction conditions: epoxide (20 mmol), catalyst (0.01 mmol) and TBAB (0.3 mmol),  $T = 80^\circ\text{C}$ ,  $P = 1\text{ MPa}$ ,  $t = 12\text{ h}$ ; Conversion = 94.3%.

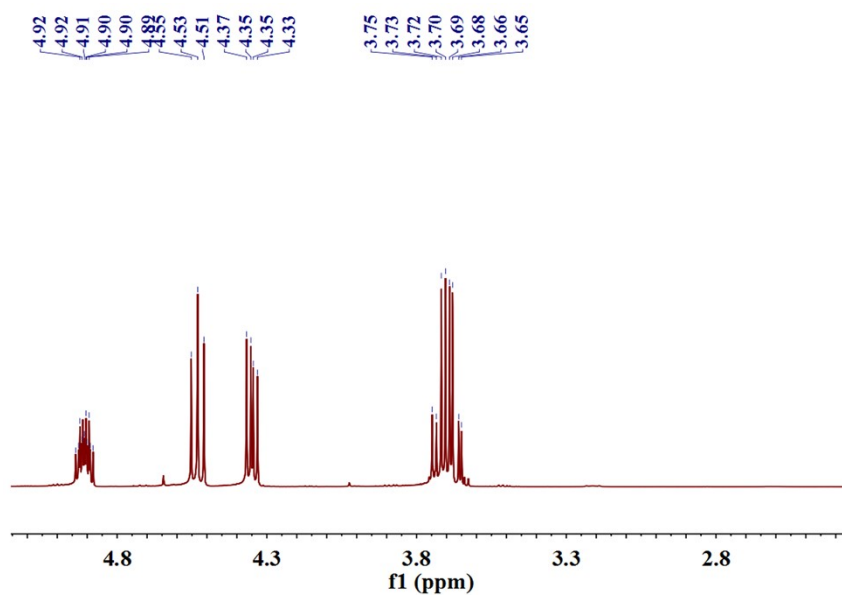

**Figure S10**  $^1\text{H}$  NMR spectra of the cycloaddition product of epichlorohydrin and  $\text{CO}_2$  (400 MHz,  $\text{CDCl}_3$ )

Reaction condition: epoxide (20 mmol), catalyst (0.01 mmol) and TBAB (0.3 mmol),  $T = 100^\circ\text{C}$ ,  $P = 1\text{ MPa}$ ,  $t = 6\text{ h}$ . Conversion:  $> 99\%$

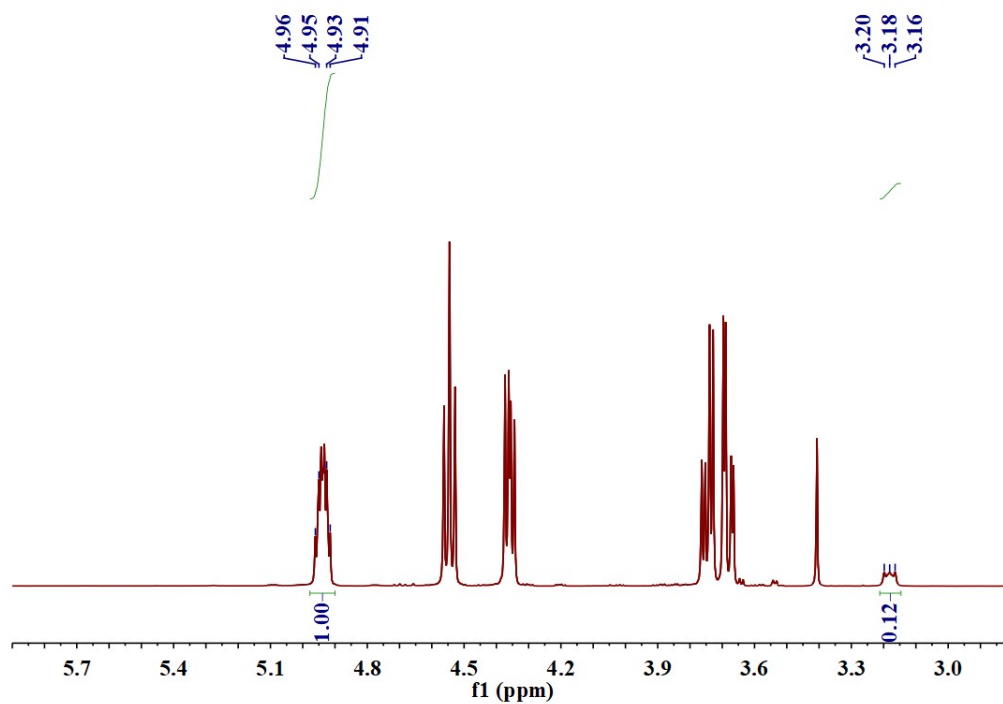

**Figure S11**  $^1\text{H}$  NMR spectra of the cycloaddition product of epichlorohydrin and  $\text{CO}_2$  (400 MHz,  $\text{CDCl}_3$ ).  $\delta$ : 4.91 -4.96 (m, 1H, COO-CH), 3.16 -3.20 (m, 1H, O- $\text{CH}_2$ ).

Reaction condition: epoxide (20 mmol),  $\text{AgNO}_3$  (0.01 mmol) and TBAB (0.3 mmol),  $T = 100\text{ }^\circ\text{C}$ ,  $P = 1\text{ MPa}$ ,  $t = 3\text{ h}$ . Conversion = 89.3%

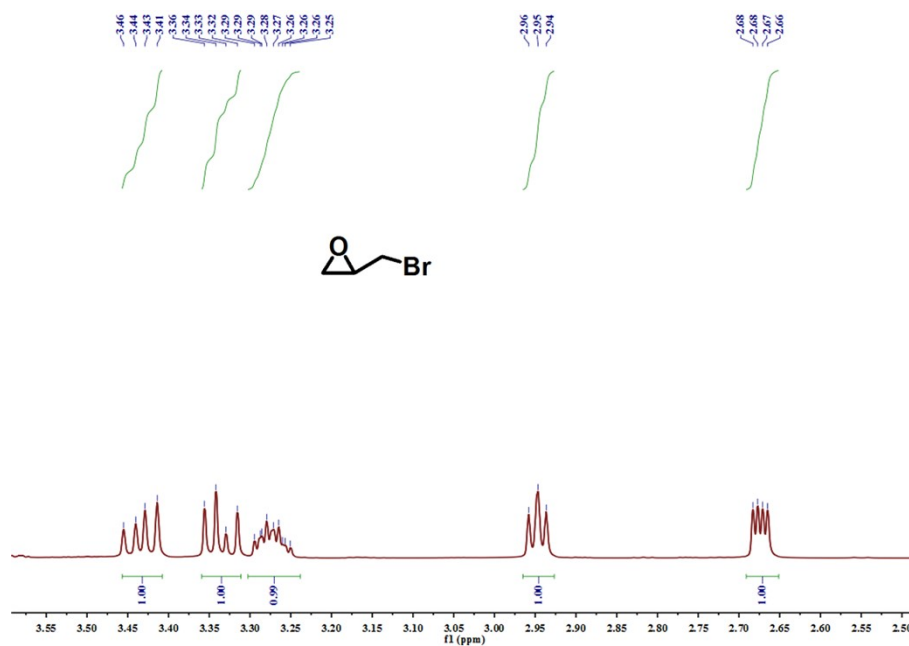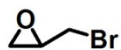

**Figure S12**  $^1\text{H}$  NMR spectra of epibromohydrin (400 MHz,  $\text{CDCl}_3$ ):  $\delta = 3.41\text{--}3.46$  (q,  $J = 8.0$  Hz, 1H,  $\text{Br-CH}_2$ ), 3.33 (q,  $J = 8.0$  Hz, 1H,  $\text{Br-CH}_2$ ), 3.25 – 3.28(m, 1H,  $\text{O-CH}^*$ ), 2.94-2.96 (t,  $J = 4.0$  Hz, 1H,  $\text{O-CH}_2$ ), 2.66-2.68 (q,  $J = 4.0$  Hz, 1H,  $\text{O-CH}_2$ ).

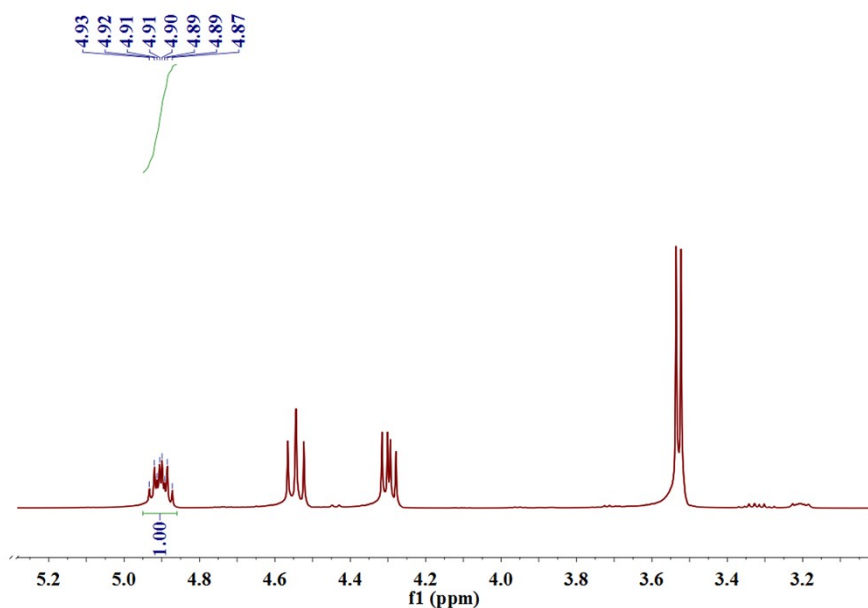

**Figure S13.**  $^1\text{H}$  NMR spectra of the cycloaddition product of epibromohydrin and  $\text{CO}_2$  for 6h (400 MHz,  $\text{CDCl}_3$ ):  $\delta = 4.87\text{--}4.93$  (m, 1H,  $\text{COO-CH}^*$  of product).

Reaction condition: epoxide (20 mmol), catalyst (0.01 mmol) and TBAB (0.3 mmol),  $T = 100$  °C,  $P = 1$  MPa,  $t = 6$  h. Conversion:  $> 99\%$

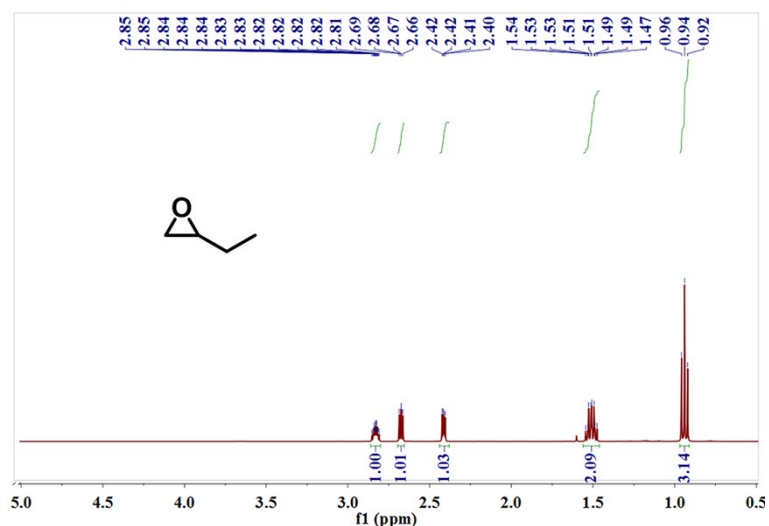

**Figure S14.**  $^1\text{H}$  NMR spectra of epoxybutane (400 MHz,  $\text{CDCl}_3$ ):  $\delta = 2.81\text{-}2.85$  (m, 1H, O-CH\*), 2.67 (t,  $J = 5.0, 4.0$  Hz, 1H, O-CH<sub>2</sub>), 2.40-2.42 (m, 1H, O-CH<sub>2</sub>), 1.47-1.54 (m, 2H, -CH<sub>2</sub>), 0.92-0.96 (t,  $J = 7.5$  Hz, 3H, -CH<sub>3</sub>).

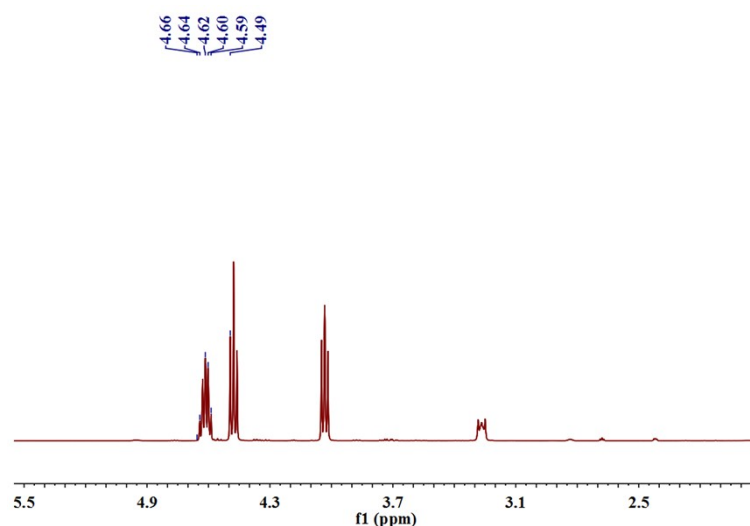

**Figure S15.**  $^1\text{H}$  NMR spectra of the cycloaddition product of epoxybutane and  $\text{CO}_2$  (400 MHz,  $\text{CDCl}_3$ ):  $\delta = 4.49 - 4.66$  (m, 1H, COO-CH\* of product).  
 Reaction condition: epoxide (20 mmol), catalyst (0.01 mmol) and TBAB (0.3 mmol),  $T = 100$  °C,  $P = 1$  MPa,  $t = 12$  h. Conversion:  $> 99\%$

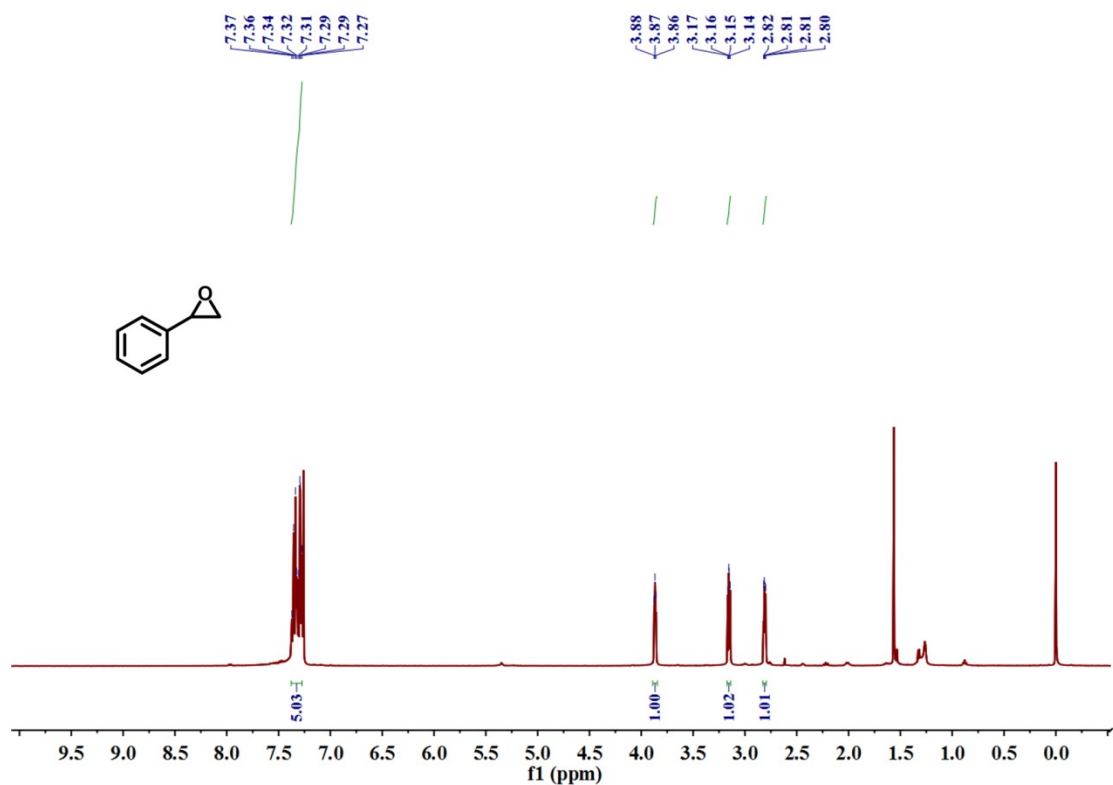

**Figure S16.**  $^1\text{H}$  NMR spectra of styrene oxide (400 MHz,  $\text{CDCl}_3$ ):  $\delta = 7.27 - 7.37$  (m, 5H, Ar-H), 3.86-3.88 (t,  $J=4.0$  Hz, 1H, O-CH), 3.14-3.17 (q,  $J=4.0$  Hz, 1H, O- $\text{CH}_2$ ), 2.80-2.82 (q,  $J = 4.0$  Hz, 1H, O- $\text{CH}_2$ ).

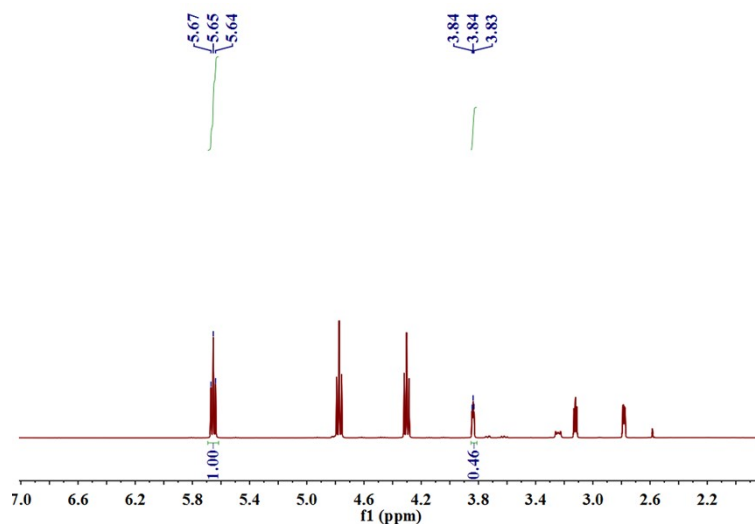

**Figure S17.**  $^1\text{H}$  NMR spectra of the cycloaddition product of styrene oxide and  $\text{CO}_2$  for 12h ( 400 MHz,  $\text{CDCl}_3$ ) :  $\delta = 5.64-5.67$  (t,  $J = 8.0$  Hz, 1H, COO- $\text{CH}^*$  of product), 3.83-3.84 (t,  $J = 8.0$  Hz, 2.20H, O- $\text{CH}^*$  of raw material).

Reaction condition: epoxide (20 mmol), catalyst (0.01 mmol) and TBAB (0.3 mmol),  $T = 100$  °C,  $P = 1$  MPa,  $t = 12$  h; Conversion = 68.5%.



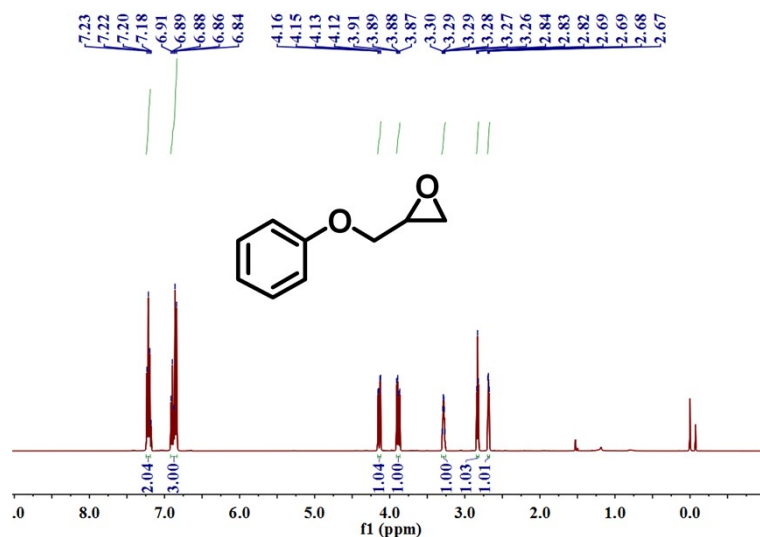

**Figure S18.**  $^1\text{H}$  NMR spectra of 1,2-epoxy-3-phenoxypropane (400 MHz,  $\text{CDCl}_3$ ) :  $\delta$  = 7.18-7.23 (m, 2H, Ar-H), 6.84-6.91 (m, 3H, Ar-H), 4.14 (q,  $J$  = 4.0 Hz, 1H, ArO- $\text{CH}_2$ ), 3.88 (q,  $J$  = 4.0 Hz, 1H, ArO- $\text{CH}_2$ ), 3.26-3.30 (m, 1H, O- $\text{CH}^*$ ), 2.83 (t,  $J$  = 4.0 Hz, 1H, O- $\text{CH}_2$ ), 2.68 (q,  $J$  = 4.00 Hz, 1H, O- $\text{CH}_2$ ).

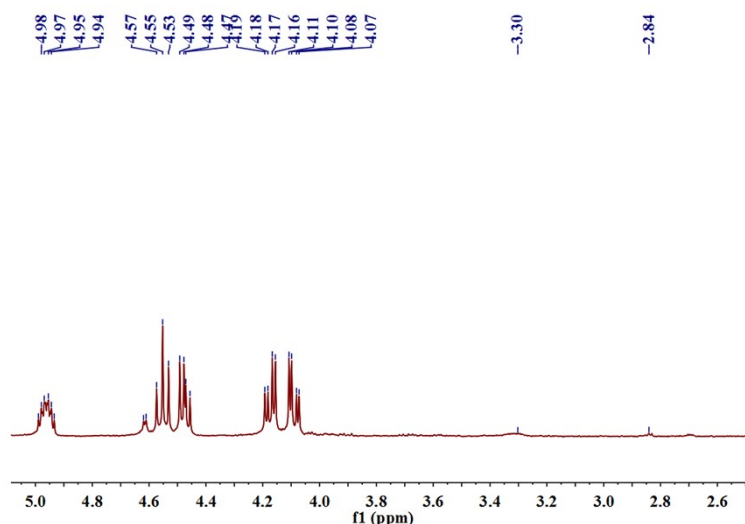

**Figure S19.**  $^1\text{H}$  NMR of the cycloaddition product of 1,2-epoxy-3-phenoxypropane and  $\text{CO}_2$  (400 MHz,  $\text{CDCl}_3$ ): 4.94 - 4.98 (m, 1H, COO-CH), 4.55 (t,  $J$  = 8.0 Hz, 1H, COO- $\text{CH}_2$ ), 4.47 (t,  $J$  = 8.0 Hz, 1H, COO- $\text{CH}_2$ ), 4.19-4.16 (m, 1.46H, 1H -ArO- $\text{CH}_2$  of product and 0.46H -ArO- $\text{CH}_2$  of 1,2-epoxy-3-phenoxypropane), 4.07-4.11 (dd,  $J$  = 8.0 Hz, 4.0 Hz, 1H, ArO- $\text{CH}_2$  of product), 3.30 (q,  $J$  = 8.0 Hz, 0.46H, ArO- $\text{CH}_2$  of 1,2-epoxy-3-phenoxypropane), 2.84 (t,  $J$  = 4.0 Hz, 0.46H, O- $\text{CH}_2$ ).

Reaction condition: epoxide (20 mmol), catalyst (0.01 mmol) and TBAB (0.3 mmol),  $T$  = 100  $^\circ\text{C}$ ,  $P$  = 1 MPa,  $t$  = 12 h; Conversion > 99%.

#### S4 References

1. D. Chakraborty, D. Musib, R. Saha, A. Das, M. K. Raza, V. Ramu, S. Chongdar, K. Sarkar, A. Bhaumik, *Material Today Chem.*, 2022, 24, 100882.
2. SMART and SAINT software package, Siemens Analytical X-ray Instruments Inc., Madison, WI, 1996.
3. (a) O.V. Dolomanov, L.J. Bourhis, R.J. Gildea, J. A. K. Howard and H. Puschmann, *J. Appl. Cryst.* 2009, 42, 339; (b) G. M. Sheldrick, *Acta Cryst. A*, 2008, 64, 112; (c) G. M. Sheldrick, *Acta Cryst. C*, 2015, 71, 3.
4. V. Guillerme, Ł. J. Weseliński, Y. Belmabkhout, A. J. Cairns, V. D'Elia, Ł. Wojtas, K. Adil and M. Eddaoudi, *Nature Chem.* 2014, 6, 673.
5. A. C. Kathalikkattil, D. W. Kim, J. Tharun, H. G. Soek, R. Roshan and D. W. Park, *Green Chem.* 2014, 16, 1607.
6. Y. W. Ren, Y. C. Shi, J. X. Chen, S. R. Yang, C. R. Qi and H. F. Jiang, *RSC Adv.* 2013, 3, 2167.
7. P. Patel, B. Parmar, R. I. Kureshy, N. H. Khan, E. Suresh, *Dalton Trans.*, 2018, 47, 8041-8051.
8. T. Zhang, H. Chen, H. Lv, Q. Li, X. Zhang, *RSC Adv.*, 2021, 11, 9731.
9. S. Senthilkumar, M. S. Maru, R. S. Somani, H. C. Bajaj and S. Neogi, *Dalton Trans.*, 2018, 47, 418.
10. Z. Zhou, C. He, J. Xiu, L. Yang and C. Duan, *J. Am. Chem. Soc.* 2015, 137, 15066.
